# Supplementary material
Source: publisher figshare collection journal article supplement (https://frontiersin.figshare.com/ndownloader/files/30447513)
Supplement: Supplementary file 1 [file 30447513]

**Supplementary Data for**

**Physiochemical properties and antibacterial activity of silver nanoparticlesgreen synthesized by *Camellia sinensis* and *Prunus africana* extracts**

***Table S1: Time taken to generate surface plasmon resonance (SPR) peaks for CSE green synthesized silver nanoparticles***

| Time (Hours) | CSE 2% | | CSE 4% | | CSE 8% | | CSE 16% | |
| --- | --- | --- | --- | --- | --- | --- | --- | --- |
| Wavelength (nm) | Abs (arb units) | Wavelength (nm) | Abs (arb units) | Wavelength | Abs (arb units) | Wavelength (nm) | Abs (arb units) |
| 0 | - | - | - | - | - | - | - | - |
| 0.5 | 430 | 3.10 | 441 | 2.98 | 456 | 3.54 | 456 | 3.54 |
| 1 | 430 | 3.92 | 447 | 4.48 | 451 | 5.02 | 451 | 5.02 |
| 2 | 430 | 4.37 | 449 | 4.99 | 456 | 5.14 | 456 | 5.20 |
| 3 | 430 | 4.54 | 449 | 5.11 | 456 | 5.23 | 456 | 5.23 |
| 4 | 430 | 4.68 | 454 | 5.15 | 456 | 5.27 | 456 | 5.30 |
| 5 | 430 | 4.84 | 454 | 5.25 | 456 | 5.33 | 456 | 5.38 |

**Table S2: Time taken to generate surface plasmon resonance (SPR) peaks for PAE green synthesized silver nanoparticles**

| Time (Hour) | 2% PAE | | 4% PAE | | 8% PAE | | 16% PAE | |
| --- | --- | --- | --- | --- | --- | --- | --- | --- |
| Wavelength (nm) | Abs (arb.units) | Wavelength (nm) | Abs (arb.units) | Wavelength  (nm) | Abs (arb.units) | Wavelength (nm) | Abs (arbunits) |
| 0 | - | - | - | - | - | - | - | - |
| 0.5 | - | - | - | - | - | - | - | - |
| 1 | - | - | - | - | - | - | - | - |
| 2 | - | - | - | - | - | - | - | - |
| 3 | - | - | - | - | - | - | - | - |
| 4 | - | - | 418 | 0.68 |  |  | - | - |
| 6 | - | - | 434 | 0.97 | 429 | 0.99 | - | - |
| 8 | 417 | 0.43 | 438 | 1.19 | 439 | 1.17 | 433 | 1.83 |
| 10 | 434 | 0.51 | 441 | 1.32 | 439 | 1.26 | 441 | 2.16 |
| 12 | 434 | 0.64 | 441 | 1.32 | 441 | 1.46 | 442 | 2.40 |
| 24 | 457 | 1.21 | 472 | 1.55 | 475 | 2.10 | 470 | 1.72 |
| 72 | - | - | - | - | - | . | - | - |
